# Supplementary material for: La reivindicación de verdad y justicia en Argentina: ¿una primavera democrática?
Source: MDPI journal article supplement (doi:10.3390/foods12050949), 2007-01-01
Supplement: s1 [file s1]

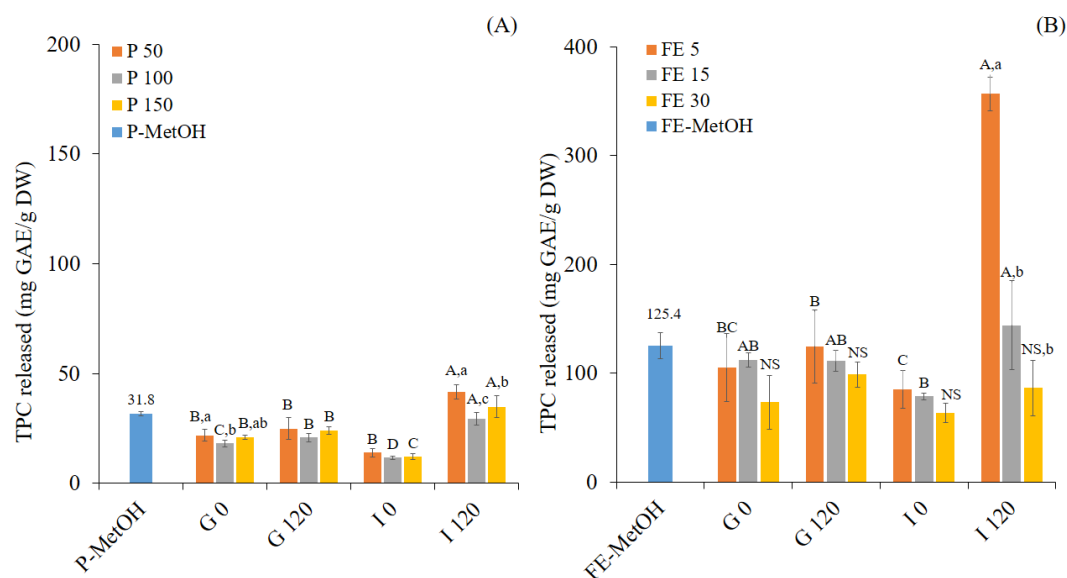

**Figure S1.** Changes in proportionate total phenolic content release (mg GAE/g DW) from white mugwort powder at different concentrations (P 50, 100, 150 mg/mL) (A) and white mugwort extract at different concentrations (FE 5, 15, 30 mg/mL) (B) during in vitro gastrointestinal digestion. Values with different letters (A-D) within the same treatment are significantly different ( $p \leq 0.05$ ). Values with different letters (a-c) within the same digestion phase are significantly different ( $p \leq 0.05$ ). P-value higher than 0.05 is represented by NS (non-significant difference).

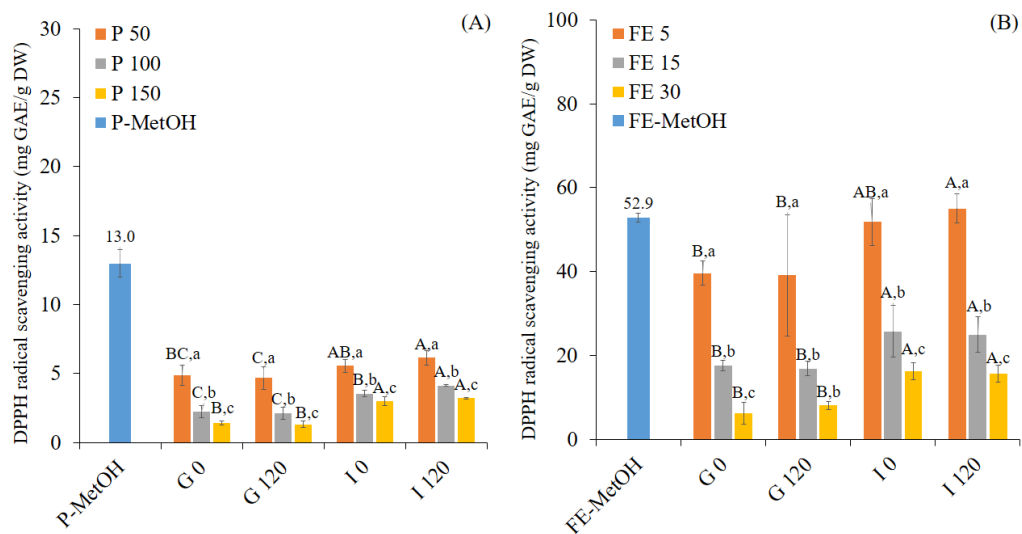

**Figure S2.** Changes in DPPH scavenging activity (mg GAE/g DW) of white mugwort powder at different concentrations (P 50, 100, 150 mg/mL) (A) and white mugwort extract at different concentrations (FE 5, 15, 30 mg/mL) (B) during in vitro gastrointestinal digestion. Values with different letters (A-C) within the same treatment are significantly different ( $p \leq 0.05$ ). Values with different letters (a-c) within the same digestion phase are significantly different ( $p \leq 0.05$ ).

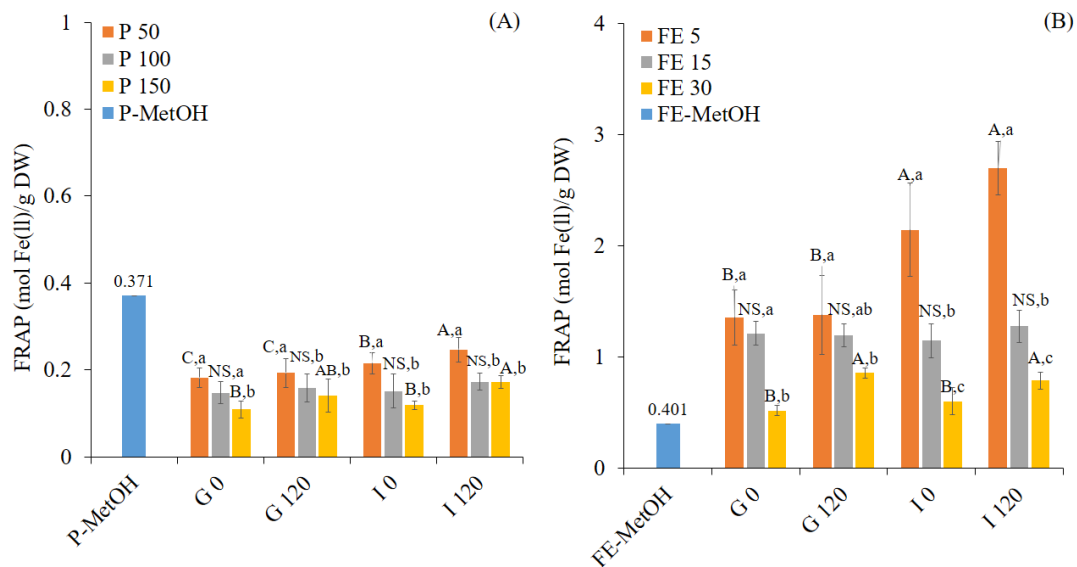

**Figure S3** Changes in FRAP value (mol Fe(II)/g DW) of white mugwort powder at different concentrations (P 50, 100, 150 mg/mL) (A) and white mugwort extract at different concentrations (FE 5, 15, 30 mg/mL) (B) during in vitro gastrointestinal digestion. Values with different letters (A-C) within the same treatment are significantly different ( $p \leq 0.05$ ). Values with different letters (a-c) within the same digestion phase are significantly different ( $p \leq 0.05$ ).

**Table S1** The content of polyphenol compounds (mg /g DW) of dried powder and fresh aerial part extract from white mugwort.

| No | Compounds<br>(mg/g dry DW) | Retention time<br>(min) | Dried powder (P)  | Fresh aerial part extract<br>(FE) |
|----|----------------------------|-------------------------|-------------------|-----------------------------------|
| 1  | 5-CQA                      | 12.4                    | 0.04 ± 0.00       | 0.26 ± 0.01                       |
| 2  | 3-CQA                      | 26.7                    | 1.40 ± 0.09       | 22.26 ± 2.28                      |
| 3  | Sinapoylmalate*            | 38.2                    | 1265.32 ± 813.53* | 8665.15 ± 50.33*                  |
| 4  | Rutin                      | 42.5                    | 0.65 ± 0.02       | 1.75 ± 0.02                       |
| 5  | Isovitexin                 | 42.9                    | 0.36 ± 0.01       | 0.92 ± 0.01                       |
| 6  | Kaempferol                 | 47.7                    | 1.21 ± 0.09       | 5.34 ± 1.03                       |
| 7  | 3,5-diCQA                  | 48.8                    | 4.58 ± 0.15       | 19.85 ± 6.10                      |
| 8  | Morin                      | 61.3                    | 0.60 ± 0.05       | 2.17 ± 0.12                       |
| 9  | Quercetin                  | 66.8                    | 0.12 ± 0.01       | 0.66 ± 0.01                       |

\*Compounds were identified by mass spectrum compared with literature and the data were expressed as relative peak area.
